# Supplementary material
Source: publisher site journal article supplement (https://www.dovepress.com/article/298620)
Supplement: Supplementary file 1 [file get_supplementary_file.php]

**Table S1 Analysis of clinical information of patients with esophageal carcinoma in TCGA database**

|  | **Esophageal adenocarcinoma (EAC, number =89)** | **Esophageal squamous cell carcinoma (ESCC, n=96)** | **P-value** |
| --- | --- | --- | --- |
| **Gender** |  |  | 0.37 |
| Female | 12 (13.5%) | 15 (15.6%) |  |
| Male | 77 (86.5%) | 81 (84.4%) |  |
| **Stage** |  |  | 0.72 |
| Early (I&II) | 34 (38.2%) | 63 (65.67%) |  |
| Terminal (III&IV) | 34 (38.2%) | 31 (32.3%) |  |
| **Status** |  |  | 0.57 |
| Dead | 38 (42.7%) | 19 (19.8%) |  |
| Alive | 51 (57.3%) | 77 (80.2%) |  |

**Table S2 KEGG function enrichment of DEGs**

| **Terms** | **Annotations** | **Term's Genes Found** | **Input Size** | **Term's Genes** | **Genes Universe** | **Hyp pVal** | **Hyp pValAdj** | **Genes** |
| --- | --- | --- | --- | --- | --- | --- | --- | --- |
| Gastric acid secretion | hsa04971 | 11 | 92 | 75 | 7949 | 7.24E-10 | 1.17E-07 | KCNE2,CCKBR,PRKACB,ATP4B,ATP4A,KCNQ1,  KCNK2,KCNJ16,HRH2,SLC9A4,SLC26A7 |
| Protein digestion and absorption | hsa04974 | 7 | 92 | 95 | 7949 | 0.000107 | 0.008648 | CELA3A,PGA5,KCNQ1,KCNJ13,PGA3,SLC16A10,  COL2A1 |

**Table S3 Biological process function enrichment of DEGs**

| **Terms** | **Annotations** | **Term's Genes Found** | **Input Size** | **Term's Genes** | **Genes Universe** | **Hyp pVal** | **Hyp pValAdj** | **Genes** |
| --- | --- | --- | --- | --- | --- | --- | --- | --- |
| Gastric acid secretion | GO:0001696 | 5 | 138 | 8 | 17898 | 1.39E-09 | 1.28E-06 | CCKBR,HRH2,SLC9A4,SLC26A7,GHRL |
| Ion transport | GO:0006811 | 19 | 138 | 670 | 17898 | 9.53E-07 | 0.000438 | CLCNKB,CLCNKA,KCNE2,SLC5A5,SLC1A2,ATP4B,  ATP4A,KCNQ1,KCNK2,KCNJ16,KCNJ13,GRIA4,SLC9A4,  GIF,SLC26A7,SLC26A9,SLC13A3,CLIC6,FXYD4 |
| Phosphocreatine biosynthetic process | GO:0046314 | 3 | 138 | 5 | 17898 | 4.43E-06 | 0.00102 | CKMT2,CKM,CKB |
| Digestion | GO:0007586 | 5 | 138 | 31 | 17898 | 3.66E-06 | 0.001124 | PGC,PGA5,PGA3,GUCA2B,GKN1 |
| Potassium ion import across plasma membrane | GO:1990573 | 5 | 138 | 43 | 17898 | 1.93E-05 | 0.003546 | KCNE2,ATP4B,ATP4A,KCNJ16,KCNJ13 |
| Creatine metabolic process | GO:0006600 | 3 | 138 | 8 | 17898 | 2.44E-05 | 0.003744 | CKMT2,CKM,CKB |
| Cholecystokinin signaling pathway | GO:0038188 | 2 | 138 | 2 | 17898 | 5.90E-05 | 0.007757 | CCKBR,CCKAR |
| Potassium ion transport | GO:0006813 | 7 | 138 | 139 | 17898 | 0.000102 | 0.009368 | KCNE2,ATP4B,ATP4A,KCNQ1,KCNK2,KCNJ16,KCNJ13 |
| Potassium ion transmembrane transport | GO:0071805 | 7 | 138 | 139 | 17898 | 0.000102 | 0.009368 | KCNE2,ATP4A,KCNQ1,KCNK2,KCNJ16,SLC9A4,FXYD4 |
| Transmembrane transport | GO:0055085 | 15 | 138 | 623 | 17898 | 9.40E-05 | 0.010814 | CLCNKB,CLCNKA,SLC16A7,SLC18A2,SLC5A5,  SLC1A2,KCNQ1,AQP4,SLC9A4,GPR155,MFSD4,  SLC16A10,SLC26A7,SLC26A9,SLC13A3 |
| Energy reserve metabolic process | GO:0006112 | 3 | 138 | 15 | 17898 | 0.000191 | 0.014618 | KL,GIF,LEPR |
| Detoxification of copper ion | GO:0010273 | 3 | 138 | 15 | 17898 | 0.000191 | 0.014618 | GIF,MT1G,MT1F |
| Regulation of ion transmembrane transport | GO:0034765 | 7 | 138 | 157 | 17898 | 0.000217 | 0.015341 | CLCNKB,CLCNKA,KCNE2,KCNQ1,KCNJ16,KCNJ13,CLIC6 |
| Regulation of response to food | GO:0032095 | 2 | 138 | 4 | 17898 | 0.000351 | 0.023036 | GIF,GHRL |
| Chloride transport | GO:0006821 | 5 | 138 | 81 | 17898 | 0.000406 | 0.024893 | CLCNKB,CLCNKA,SLC26A7,SLC26A9,CLIC6 |
| Anion transmembrane transport | GO:0098656 | 4 | 138 | 47 | 17898 | 0.000467 | 0.026832 | SLC1A2,SLC9A4,SLC26A7,SLC26A9 |
| Cellular lipid catabolic process | GO:0044242 | 2 | 138 | 5 | 17898 | 0.000581 | 0.029711 | GIF,ACADL |
| Cellular metal ion homeostasis | GO:0006875 | 2 | 138 | 5 | 17898 | 0.000581 | 0.029711 | GIF,MT1F |
| Cellular response to zinc ion | GO:0071294 | 3 | 138 | 23 | 17898 | 0.000709 | 0.03435 | GIF,MT1G,MT1F |
| Ion transmembrane transport | GO:0034220 | 8 | 138 | 258 | 17898 | 0.000886 | 0.03543 | CLCNKB,CLCNKA,ATP4B,ATP4A,KCNJ16,  GRIA4,CLIC6,FXYD4 |
| Chloride transmembrane transport | GO:1902476 | 5 | 138 | 96 | 17898 | 0.000883 | 0.036927 | CLCNKB,CLCNKA,SLC26A7,SLC26A9,CLIC6 |
| Negative regulation of voltage-gated potassium channel activity | GO:1903817 | 2 | 138 | 6 | 17898 | 0.000868 | 0.038007 | KCNE2,KCNQ1 |
| S-adenosylmethionine metabolic process | GO:0046500 | 2 | 138 | 6 | 17898 | 0.000868 | 0.038007 | BHMT,GNMT |
| Gland development | GO:0048732 | 2 | 138 | 7 | 17898 | 0.001208 | 0.041176 | CCKBR,HRH2 |
| Cellular water homeostasis | GO:0009992 | 2 | 138 | 7 | 17898 | 0.001208 | 0.041176 | SCTR,AQP4 |
| Insulin secretion involved in cellular response to glucose stimulus | GO:0035773 | 2 | 138 | 7 | 17898 | 0.001208 | 0.041176 | RAB11FIP2,PTPRN2 |
| Cellular response to copper ion | GO:0071280 | 3 | 138 | 27 | 17898 | 0.001146 | 0.043913 | GIF,MT1G,MT1F |
| Cellular zinc ion homeostasis | GO:0006882 | 3 | 138 | 29 | 17898 | 0.001415 | 0.046494 | GIF,MT1G,MT1F |

**Table S4 Cell composition function enrichment of DEGs**

| **Terms** | **Annotations** | **Term's Genes Found** | **Input Size** | **Term's Genes** | **Genes Universe** | **Hyp pVal** | **Hyp pValAdj** | **Genes** |
| --- | --- | --- | --- | --- | --- | --- | --- | --- |
| Extracellular region | GO:0005576 | 36 | 148 | 2421 | 18912 | 9.05E-05 | 0.015479 | METTL7A,CHAD,ADAM28,KL,LIPF,PSCA,PGC,PGA5,  MUC6,GIF,LIFR,LEPR,AQP4,PSAPL1,PGA3,GUCA2B,GIF  ,GDF9,CXCL17,FNDC5,GKN2,SPINK13,FMOD,PM20D1,  CCBE1,C16orf89,ALAD,PDGFD,XYLT2,SCUBE2,ASAH2,  GKN1,GHRL,ANGPTL3,COL2A1,B3GAT1 |
| Astrocyte end-foot | GO:0097450 | 2 | 148 | 3 | 18912 | 0.000182 | 0.015523 | GIF,AQP4 |
| Extracellular space | GO:0005615 | 28 | 148 | 1852 | 18912 | 0.000498 | 0.021306 | CKM,CKB,CHAD,CELA3A,KL,ATP4A,PGC,GIF,GIF,PSAPL1,  GIF,FAM19A2,GDF9,CXCL17,GKN2,FMOD,PM20D1,  CCBE1,ALAD,PKHD1L1,PDGFD,XYLT2,SCUBE2,ASAH2,  GKN1,GHRL,ANGPTL3,COL2A1 |
| Integral component of membrane | GO:0016021 | 61 | 148 | 5316 | 18912 | 0.000396 | 0.022556 | CLCNKB,CLCNKA,METTL7A,STX12,VSIG2,ADAM28,FUT9,  KCNE2,KL,CCKBR,CCKAR,SLC16A7,SLC18A2,SLC5A5,  SLC1A2,SCTR,PXMP2,PTPRN2,PTGER3,ATP4B,ATP4A,LIFR,  LEPR,KCNQ1,KCNK2,KCNJ16,KCNJ13,AQP4,TMEM229A,  HRH2,GALNTL6,GRIA4,GPER1,SLC9A4,SMIM1,GPR150,  B4GALNT3,TMEM211,FNDC5,TMEM161B,GPR155,FMO5,  MFSD4,TMED6,DPCR1,SLC16A10,SLC26A7,SLC26A9,  SIGLEC11,PKHD1L1,DNER,EPHA5,SLC13A3,XYLT2,  ASAH2,RPRM,CLIC6,SMIM11,FXYD4,B3GAT1,GBGT1 |
| Membrane | GO:0016020 | 81 | 148 | 7926 | 18912 | 0.001082 | 0.023126 | CLCNKB,CLCNKA,METTL7A,STX12,CKMT2,VSIG2,RAB11FIP2,  ADAM28,FUT9,ECI2,KCNE2,HOMER2,KL,CCKBR,CCKAR,  SLC16A7,PSCA,SLC18A2,SLC5A5,SLC1A2,SH3GL2,SCTR,RAP1GAP,  PXMP2,PTPRN2,PTGER3,PRKACB,UBL3,PIK3C2G,ATP4B,ATP4A,  ARHGDIG,LIFR,LEPR,KCNQ1,KCNK2,KCNJ16,KCNJ13,AQP4,TMEM229A,  HRH2,GALNTL6,GRIA4,GPER1,SLC9A4,SMIM1, REP15,KCTD8,  GPR150,B4GALNT3,TMEM211,FNDC5,TMEM161B,GPR155, FMO5,MFSD4,  C16orf89,TMED6,DPCR1,SLC16A10,SLC26A7,SLC26A9,SIGLEC11,  PKHD1L1,DNER,EPHA5,GRIP2,PDGFD,SLC13A3,ARHGEF28,XYLT2,  ASAH2,ERO1LB,RPRM,CYP2C8,CLIC6,SMIM11,FXYD4,B3GAT1,  CYFIP2,GBGT1 |
| Multivesicular body lumen | GO:0097486 | 2 | 148 | 7 | 18912 | 0.001245 | 0.023654 | PGA5,PGA3 |
| Integral component of plasma membrane | GO:0005887 | 23 | 148 | 1433 | 18912 | 0.00076 | 0.026006 | CLCNKB,CLCNKA,VSIG2,KL,CCKAR,SLC16A7,SLC18A2,SLC1A2,  PTPRN2,PTGER3,ATP4A,LIFR,KCNK2,AQP4,HRH2,GPER1,GPR150,  MFSD4,SLC16A10,SLC26A7,SLC26A9,EPHA5,ASAH2 |
| Basolateral plasma membrane | GO:0016323 | 7 | 148 | 202 | 18912 | 0.001074 | 0.026243 | LEPR,KCNQ1,KCNJ16,AQP4,SLC9A4,SLC16A10,SLC26A7 |
| Cell | GO:0005623 | 19 | 148 | 1107 | 18912 | 0.001045 | 0.029785 | CKB,RAB11FIP2,CCKBR,CSRP3,SCTR,PTPRN2,PTGER3,  ATP4B,ATP4A,GIF,MT1G,MT1F,AQP4,GPER1,SLC9A4,PLCZ1,  PDIA2,ERO1LB,GHRL |
| Astrocyte projection | GO:0097449 | 2 | 148 | 9 | 18912 | 0.002112 | 0.036122 | GIF,KCNK2 |

**Table S5 Molecular function enrichment of DEGs**

| **Terms** | **Annotations** | **Term's Genes Found** | **Input Size** | **Term's Genes** | **Genes Universe** | **Hyp pVal** | **Hyp pValAdj** | **Genes** |
| --- | --- | --- | --- | --- | --- | --- | --- | --- |
| Creatine kinase activity | GO:0004111 | 3 | 137 | 6 | 17822 | 8.74E-06 | 0.003015 | CKMT2,CKM,CKB |
| Steroid binding | GO:0005496 | 4 | 137 | 29 | 17822 | 6.84E-05 | 0.005896 | GPER1,ESRRG,ESRRB,PDIA2 |
| Cholecystokinin receptor activity | GO:0004951 | 2 | 137 | 2 | 17822 | 5.87E-05 | 0.006746 | CCKBR,CCKAR |
| Potassium:proton exchanging ATPase activity | GO:0008900 | 2 | 137 | 3 | 17822 | 0.000175 | 0.007551 | ATP4B,ATP4A |
| Aspartic-type endopeptidase activity | GO:0004190 | 4 | 137 | 26 | 17822 | 4.38E-05 | 0.007557 | PGC,PGA5,PGA3,DDI1 |
| Transferase activity, transferring phosphorus-containing groups | GO:0016772 | 3 | 137 | 13 | 17822 | 0.00012 | 0.008289 | CKMT2,CKM,CKB |
| Voltage-gated ion channel activity | GO:0005244 | 7 | 137 | 152 | 17822 | 0.000174 | 0.008588 | CLCNKB,CLCNKA,KCNE2,KCNQ1,KCNJ16,KCNJ13,CLIC6 |
| chloride channel activity | GO:0005254 | 5 | 137 | 66 | 17822 | 0.000153 | 0.0088 | CLCNKB,CLCNKA,SLC26A7,SLC26A9,CLIC6 |
| Inward rectifier potassium channel activity | GO:0005242 | 3 | 137 | 20 | 17822 | 0.00046 | 0.015881 | KCNE2,KCNJ16,KCNJ13 |
| Peptide hormone binding | GO:0017046 | 4 | 137 | 46 | 17822 | 0.000425 | 0.016274 | CCKBR,CCKAR,SCTR,LEPR |
| Fatty-acyl-CoA binding | GO:0000062 | 3 | 137 | 21 | 17822 | 0.000534 | 0.016749 | ECI2,ALDH6A1,ACADL |
